# Supplementary material
Source: PubMed Central journal article supplement (PMC6936961)
Supplement: dgz155-s1.pdf [file dgz155-s1.pdf]

## Supplementary Methods – Quantification of LPIs, fatty acids, and acylcarnitines using LC-MS/MS and GC-MS/MS

### *Chemicals and reagents*

Methanol, formic acid, ammonium formate, and most standards including  $\alpha$ -lysophosphatidylinositol (LPI) sodium salt (LPI 16:0, 58%), *myo*-inositol, myristic acid, palmitic acid, palmitoleic acid, stearic acid, oleic acid, linoleic acid,  $\alpha$ -linolenic acid, gondoic acid, arachidonic acid, eicosapentaenoic acid, docosahexaenoic acid, carnitine hydrochloride, acetylcarnitine hydrochloride, propionylcarnitine, butyrylcarnitine, octanoylcarnitine, and palmitoylcarnitine were purchased from Sigma-Aldrich. Isotopically labeled acylcarnitine mix standard (NSK-B) and 6-<sup>13</sup>C-glucose (CLM-481) was purchased from Cambridge Isotope Laboratories. 12,13-dihydroxy-octadecenoic acid-d<sub>4</sub> (12,13-DiHOME-d<sub>4</sub>) and 12,13-epoxy-octadecenoic acid-d<sub>4</sub> (12,13-EpOME-d<sub>4</sub>) were purchased from Cayman Chemical. Acetonitrile (mass grade) was purchased from Merck. Distilled water was purified "in-house" using a Milli-Q purification system (Bedford, MA, USA).

### *Serum collection and preparation*

Antecubital venous blood samples (20 ml) were taken from consenting participants in the morning; fasting was not required before blood collection. After collection, blood samples were immediately placed on ice for transportation and were processed within 6 h to obtain serum samples, which were subsequently stored at -80°C. Serum samples used for the current study were allowed to thaw at 4°C overnight. Thawed serum samples (50  $\mu$ L) were diluted with 50  $\mu$ L of distilled water. The mixture was treated with 500  $\mu$ L of ice-cold methanol (isotope labeled acylcarnitine mix standard, 12,13-EpOME-d<sub>4</sub>, and 12,13-DiHOME-d<sub>4</sub> as internal standards) for protein precipitation. After centrifugation at 20,817 g for 15 min at 4°C, the supernatant fraction was filtered by Thermo Scientific™ national 750  $\mu$ L micro-centrifugal filters (PTFE membrane, 0.2  $\mu$ m pore size, non-sterile). The filtrate was direct-injected for quantitative analyses of LPIs, fatty acids, and acylcarnitines. Quality control (QC) was prepared by spiking certain amount native and labeled standards into a pooled plasma from all participants, and six QCs were analyzed along with the samples in each batch to ensure the reliability of the method and the instrument stability.

### *LC-MS/MS analysis*

The quantitative analyses of LPIs, fatty acids, and acylcarnitines were performed on an Agilent 1200 HPLC system coupled to a 6410 Triple Quadrupole (QQQ) mass spectrometer equipped with an electrospray ionization source. The metabolites were separated by using an Acquity UPLC BEH C18 column (2.1 mm  $\times$  100 mm, 1.7  $\mu$ m, Waters). The mobile phases A (water/acetonitrile [30/70, v/v] with 0.1% formic acid and 10 mmol/L ammonium formate) and B (acetonitrile/isopropanol [90/10, v/v]) were employed for LPIs and fatty acids analyses. The gradient program was: 0-1 min, 0% B; 1-11 min, 0-100% B; 11-16 min, 100% B; 16-16.5 min, 100-0% B. For acylcarnitine analysis, the mobile phases A (water with 10 mmol/L ammonium formate and 0.1% formic acid) and B (acetonitrile/isopropanol [90/10, v/v]) were employed. The gradient program was: 0-1 min, 1%B; 1-2 min, 1-90% B; 2-6 min, 90% B; 6-11 min, 90-100% B; 11-16 min, 100% B; 16-16.5 min, 100-1% B. The flow rate was set at 0.3 mL/min. The column temperature and injection volume were set at 40°C and 10  $\mu$ L, respectively. The LPIs and fatty acids were analyzed in negative ion mode, whereas acylcarnitines were detected in positive ion mode. The mass spectrum was acquired in the multiple reaction monitoring (MRM) mode with a capillary voltage of 3500 V, gas temperature of 350°C, gas flow of 12 L/min and nebulizer nitrogen gas flow rate of 30 psi. The retention time, MRM transition, fragmentor voltage and collision energy (CE) were shown in **Supplementary Table S1**.

### *GC-MS/MS analysis*

The quantitative analysis of inositol was performed on an Agilent 7890 GC system coupled to a 7000B QQQ mass detector equipped with a chemical ionization (CI) source. A J&W HP-5MS-23 column (60 m  $\times$  0.25 mm  $\times$  0.25  $\mu$ m, USA) was used for sample separation. The injection volume was 1  $\mu$ L in pulsed splitless mode. The flow rate of the carrier gas, helium, was 2 mL/min. The GC oven temperature was started at 120 °C for 1 min and raised from 120 °C to 200 °C at 25 °C/min, then raised to 217 °C at 1.5 °C/min, followed by raising from 217 °C to 300 °C at 25 °C/min and maintained at 300 °C for 5 min. Mass spectrum was acquired in positive MRM mode with the parameters as follow: methane was used as reactant gas, and gas flow was set at 20%, ion source temperature was 250 °C. The optimized parameters on MRM transition and CE are shown in **Supplementary Table S1**.

### *Method validation*

Both LC-MS/MS and GC-MS/MS methods were validated for linearity, recovery, accuracy, and precision, according to Food and Drug Administration (FDA) guideline for biological method as our previous published report (1). The

limit of detection (LOD) was calculated based on the signal-to-noise ratio at 3. The calibration curves were constructed from three replicate measurements of six concentrations of each standard. A linear regression with  $r^2 > 0.995$  was obtained in all relevant ranges. Recoveries were evaluated by spiking defined amounts of deuterated internal standards into aliquots of unprocessed serum and calculated by comparing peak areas from serum against mean peak areas of three equal amounts of unprocessed compounds in pure solvent. The recoveries generally ranged from 72.1% to 120.5% for all compounds. For intra-batch and inter-batch precision and accuracy, the relative standard deviation (RSD) values ranged from 0.05% to 19.27% and 0.15% to 18.50%, respectively.

#### *Data analysis*

All metabolites were quantified by normalizing to their corresponding internal standards described in **Supplemental Table S1**. The normalization for metabolite<sub>*i*</sub> of sample<sub>*j*</sub> and internal standards<sub>*k*</sub> was performed by using the following equation (1):

$$\text{metabolite}_{ij, \text{normalized}} = \text{metabolite}_{ij, \text{raw}} / \text{internal standards}_k \times \text{concentration internal standards} \quad (1)$$

#### Reference:

1. Xu YJ, Ho WE, Xu F, Wen T, Ong CN. Exploratory investigation reveals parallel alteration of plasma fatty acids and eicosanoids in coronary artery disease patients. *Prostaglandins Other Lipid Mediat* 2013;106:29-36.

Table S1. Optimized multiple reaction monitoring (MRM) conditions for determination of 61 metabolites

| Metabolite                                    | Platform      | R.T.<br>(min) | Transition ion<br>(m/z) | Fragmentor<br>voltage (V) | CE<br>(eV) | Internal standard           | Calibration curve    |
|-----------------------------------------------|---------------|---------------|-------------------------|---------------------------|------------|-----------------------------|----------------------|
| <i>Inositol and lysophosphatidylinositols</i> |               |               |                         |                           |            |                             |                      |
| <i>myo</i> -Inositol                          | GC-MS/MS      | 19.46         | 265.0 → 221.0           | -                         | 10         | 6- <sup>13</sup> C-Glucose  | <i>myo</i> -Inositol |
| Lysophosphatidylinositol (LPI) (16:0)         | LC-MS/MS, neg | 10.83         | 571.3 → 241.2           | 135                       | 35         | 12,13-DiHOME-d <sub>4</sub> | LPI (16:0)           |
| LPI (16:1)                                    | LC-MS/MS, neg | 9.87          | 569.3 → 241.2           | 135                       | 35         | 12,13-DiHOME-d <sub>4</sub> | LPI (16:0)           |
| LPI (18:0)                                    | LC-MS/MS, neg | 12.14         | 599.3 → 241.2           | 135                       | 35         | 12,13-DiHOME-d <sub>4</sub> | LPI (16:0)           |
| LPI (18:1)                                    | LC-MS/MS, neg | 11.14         | 597.3 → 241.2           | 135                       | 35         | 12,13-DiHOME-d <sub>4</sub> | LPI (16:0)           |
| LPI (18:2)                                    | LC-MS/MS, neg | 10.31         | 595.3 → 241.2           | 135                       | 35         | 12,13-DiHOME-d <sub>4</sub> | LPI (16:0)           |
| LPI (20:4)                                    | LC-MS/MS, neg | 10.33         | 619.2 → 241.2           | 135                       | 35         | 12,13-DiHOME-d <sub>4</sub> | LPI (16:0)           |
| LPI (22:6)                                    | LC-MS/MS, neg | 10.28         | 643.3 → 241.2           | 135                       | 35         | 12,13-DiHOME-d <sub>4</sub> | LPI (16:0)           |
| <i>Fatty acids</i>                            |               |               |                         |                           |            |                             |                      |
| Lauric acid (12:0)                            | LC-MS/MS, neg | 12.10         | 199.1 → 199.1           | 110                       | -          | 12,13-EpOME-d <sub>4</sub>  | Myristic acid        |
| Myristic acid (14:0)                          | LC-MS/MS, neg | 13.46         | 227.2 → 227.2           | 110                       | -          | 12,13-EpOME-d <sub>4</sub>  | Myristic acid        |
| Palmitic acid (16:0)                          | LC-MS/MS, neg | 14.59         | 255.2 → 255.2           | 110                       | -          | 12,13-EpOME-d <sub>4</sub>  | Palmitic acid        |
| Palmitoleic acid (16:1n-7)                    | LC-MS/MS, neg | 13.62         | 253.2 → 253.2           | 110                       | -          | 12,13-EpOME-d <sub>4</sub>  | Palmitoleic acid     |
| Stearic acid (18:0)                           | LC-MS/MS, neg | 15.69         | 283.3 → 283.3           | 110                       | -          | 12,13-EpOME-d <sub>4</sub>  | Stearic acid         |
| Oleic acid (18:1n-9)                          | LC-MS/MS, neg | 14.69         | 281.3 → 281.3           | 110                       | -          | 12,13-EpOME-d <sub>4</sub>  | Oleic acid           |
| Linoleic acid (18:2n-6)                       | LC-MS/MS, neg | 13.87         | 279.2 → 279.2           | 110                       | -          | 12,13-EpOME-d <sub>4</sub>  | Linoleic acid        |
| α-Linolenic acid (18:3n-3)                    | LC-MS/MS, neg | 13.14         | 277.2 → 277.2           | 110                       | -          | 12,13-EpOME-d <sub>4</sub>  | α-Linolenic acid     |
| γ-Linolenic acid (18:3n-6)                    | LC-MS/MS, neg | 13.24         | 277.2 → 277.2           | 110                       | -          | 12,13-EpOME-d <sub>4</sub>  | α-Linolenic acid     |
| Gondoic acid (20:1n-11)                       | LC-MS/MS, neg | 15.70         | 309.3 → 309.3           | 110                       | -          | 12,13-EpOME-d <sub>4</sub>  | Gondoic acid         |
| Eicosadienoic acid (20:2n-6)                  | LC-MS/MS, neg | 14.83         | 307.3 → 307.3           | 110                       | -          | 12,13-EpOME-d <sub>4</sub>  | Arachidonic acid     |
| Dihomo-γ-linolenic acid (20:3n-6)             | LC-MS/MS, neg | 14.14         | 305.2 → 305.2           | 110                       | -          | 12,13-EpOME-d <sub>4</sub>  | Arachidonic acid     |
| Mead acid (20:3n-9)                           | LC-MS/MS, neg | 14.39         | 305.2 → 305.2           | 110                       | -          | 12,13-EpOME-d <sub>4</sub>  | Arachidonic acid     |
| Arachidonic acid (20:4n-6)                    | LC-MS/MS, neg | 13.67         | 303.2 → 259.3           | 110                       | 5          | 12,13-EpOME-d <sub>4</sub>  | Arachidonic acid     |
| Eicosapentaenoic acid (EPA) (20:5n-3)         | LC-MS/MS, neg | 13.00         | 301.2 → 257.2           | 110                       | 5          | 12,13-EpOME-d <sub>4</sub>  | EPA                  |
| Adrenic acid (22:4n-6)                        | LC-MS/MS, neg | 14.41         | 331.2 → 331.2           | 110                       | -          | 12,13-EpOME-d <sub>4</sub>  | Arachidonic acid     |
| Clupanodonic acid (22:5n-3)                   | LC-MS/MS, neg | 13.79         | 329.2 → 329.2           | 110                       | -          | 12,13-EpOME-d <sub>4</sub>  | Arachidonic acid     |

|                                             |               |       |                |     |    |                                                        |                               |
|---------------------------------------------|---------------|-------|----------------|-----|----|--------------------------------------------------------|-------------------------------|
| Osbond acid (22:5n-6)                       | LC-MS/MS, neg | 14.06 | 329.2 -> 329.2 | 110 | -  | 12,13-EpOME-d <sub>4</sub>                             | Arachidonic acid              |
| Docosahexaenoic acid (DHA) (22:6n-3)        | LC-MS/MS, neg | 13.45 | 327.2 -> 283.2 | 110 | 5  | 12,13-EpOME-d <sub>4</sub>                             | DHA                           |
| <i>Carnitine and acylcarnitines</i>         |               |       |                |     |    |                                                        |                               |
| L-Carnitine                                 | LC-MS/MS, pos | 1.00  | 162.1 -> 85.0  | 135 | 20 | <sup>13</sup> C <sub>6</sub> , <sup>15</sup> N-Leucine | D <sub>9</sub> -carnitine     |
| Acetylcarnitine (C2)                        | LC-MS/MS, pos | 1.06  | 204.1 -> 85.0  | 135 | 20 | <sup>13</sup> C <sub>6</sub> , <sup>15</sup> N-Leucine | D <sub>3</sub> -C2 carnitine  |
| Propionylcarnitine (C3)                     | LC-MS/MS, pos | 1.05  | 218.2 -> 85.0  | 135 | 20 | <sup>13</sup> C <sub>6</sub> , <sup>15</sup> N-Leucine | D <sub>3</sub> -C3 carnitine  |
| Butyrylcarnitine (C4)                       | LC-MS/MS, pos | 4.71  | 232.2 -> 85.0  | 135 | 20 | <sup>13</sup> C <sub>6</sub> , <sup>15</sup> N-Leucine | D <sub>3</sub> -C4 carnitine  |
| 3-Hydroxybutyrylcarnitine(C4OH)             | LC-MS/MS, pos | 1.06  | 248.2 -> 85.0  | 135 | 20 | <sup>13</sup> C <sub>6</sub> , <sup>15</sup> N-Leucine | D <sub>3</sub> -C3 carnitine  |
| Valerylcarnitine (C5)                       | LC-MS/MS, pos | 4.82  | 246.2 -> 85.0  | 135 | 20 | <sup>13</sup> C <sub>6</sub> , <sup>15</sup> N-Leucine | D <sub>9</sub> -C5 carnitine  |
| 3-Hydroxyisovalerylcarnitine (C5OH)         | LC-MS/MS, pos | 1.06  | 262.2 -> 85.0  | 135 | 20 | <sup>13</sup> C <sub>6</sub> , <sup>15</sup> N-Leucine | D <sub>3</sub> -C3 carnitine  |
| Hexanoylcarnitine (C6)                      | LC-MS/MS, pos | 4.94  | 260.2 -> 85.0  | 135 | 20 | <sup>13</sup> C <sub>6</sub> , <sup>15</sup> N-Leucine | D <sub>9</sub> -C5 carnitine  |
| 3-Hydroxyhexanoylcarnitine (C6OH)           | LC-MS/MS, pos | 4.74  | 276.2 -> 85.0  | 135 | 20 | <sup>13</sup> C <sub>6</sub> , <sup>15</sup> N-Leucine | D <sub>3</sub> -C4 carnitine  |
| Octanoylcarnitine (C8)                      | LC-MS/MS, pos | 5.22  | 288.3 -> 85.0  | 135 | 20 | <sup>13</sup> C <sub>6</sub> , <sup>15</sup> N-Leucine | D <sub>3</sub> -C8 carnitine  |
| 3-Hydroxyoctanoylcarnitine (C8OH)           | LC-MS/MS, pos | 4.95  | 304.3 -> 85.0  | 135 | 20 | <sup>13</sup> C <sub>6</sub> , <sup>15</sup> N-Leucine | D <sub>3</sub> -C8 carnitine  |
| Decanoylcarnitine (C10)                     | LC-MS/MS, pos | 5.60  | 316.3 -> 85.0  | 135 | 20 | <sup>13</sup> C <sub>6</sub> , <sup>15</sup> N-Leucine | D <sub>3</sub> -C8 carnitine  |
| 3-Hydroxydecanoylcarnitine (C10OH)          | LC-MS/MS, pos | 5.22  | 332.3 -> 85.0  | 135 | 20 | <sup>13</sup> C <sub>6</sub> , <sup>15</sup> N-Leucine | D <sub>3</sub> -C8 carnitine  |
| 9-Decenoylcarnitine (C10:1)                 | LC-MS/MS, pos | 5.41  | 314.3 -> 85.0  | 135 | 20 | <sup>13</sup> C <sub>6</sub> , <sup>15</sup> N-Leucine | D <sub>3</sub> -C8 carnitine  |
| Dodecanoylcarnitine (C12)                   | LC-MS/MS, pos | 6.09  | 344.3 -> 85.0  | 135 | 20 | <sup>13</sup> C <sub>6</sub> , <sup>15</sup> N-Leucine | D <sub>3</sub> -C8 carnitine  |
| 3-Hydroxydodecanoylcarnitine (C12OH)        | LC-MS/MS, pos | 5.60  | 360.3 -> 85.0  | 135 | 20 | <sup>13</sup> C <sub>6</sub> , <sup>15</sup> N-Leucine | D <sub>3</sub> -C8 carnitine  |
| 2-Dodecenoylcarnitine (C12:1)               | LC-MS/MS, pos | 5.80  | 342.3 -> 85.0  | 135 | 20 | <sup>13</sup> C <sub>6</sub> , <sup>15</sup> N-Leucine | D <sub>3</sub> -C8 carnitine  |
| Tetradecanoylcarnitine (C14)                | LC-MS/MS, pos | 6.76  | 372.4 -> 85.0  | 135 | 25 | <sup>13</sup> C <sub>6</sub> , <sup>15</sup> N-Leucine | D <sub>9</sub> -C14 carnitine |
| 3-Hydroxytetradecanoylcarnitine(C14OH)      | LC-MS/MS, pos | 6.10  | 388.4 -> 85.0  | 135 | 25 | <sup>13</sup> C <sub>6</sub> , <sup>15</sup> N-Leucine | D <sub>9</sub> -C14 carnitine |
| 2-Tetradecenoylcarnitine (C14:1)            | LC-MS/MS, pos | 6.34  | 370.4 -> 85.0  | 135 | 25 | <sup>13</sup> C <sub>6</sub> , <sup>15</sup> N-Leucine | D <sub>9</sub> -C14 carnitine |
| Hexadecanoylcarnitine (C16)                 | LC-MS/MS, pos | 7.72  | 400.4 -> 85.0  | 135 | 25 | <sup>13</sup> C <sub>6</sub> , <sup>15</sup> N-Leucine | D <sub>3</sub> -C16 carnitine |
| 3-Hydroxyhexadecanoylcarnitine (C16OH)      | LC-MS/MS, pos | 6.77  | 416.4 -> 85.0  | 135 | 25 | <sup>13</sup> C <sub>6</sub> , <sup>15</sup> N-Leucine | D <sub>9</sub> -C14 carnitine |
| 9-Hexadecenoylcarnitine (C16:1)             | LC-MS/MS, pos | 6.98  | 398.4 -> 85.0  | 135 | 25 | <sup>13</sup> C <sub>6</sub> , <sup>15</sup> N-Leucine | D <sub>9</sub> -C14 carnitine |
| 3-Hydroxy-9-hexadecenoylcarnitine (C16:1OH) | LC-MS/MS, pos | 6.33  | 414.4 -> 85.0  | 135 | 25 | <sup>13</sup> C <sub>6</sub> , <sup>15</sup> N-Leucine | D <sub>9</sub> -C14 carnitine |
| 9,12-Hexadecadienoylcarnitine (C16:2)       | LC-MS/MS, pos | 6.50  | 396.4 -> 85.0  | 135 | 25 | <sup>13</sup> C <sub>6</sub> , <sup>15</sup> N-Leucine | D <sub>9</sub> -C14 carnitine |
| Octadecanoylcarnitine (C18)                 | LC-MS/MS, pos | 8.96  | 428.4 -> 85.0  | 135 | 25 | <sup>13</sup> C <sub>6</sub> , <sup>15</sup> N-Leucine | D <sub>3</sub> -C16 carnitine |

|                                                |               |      |               |     |    |                                                        |                               |
|------------------------------------------------|---------------|------|---------------|-----|----|--------------------------------------------------------|-------------------------------|
| 3-Hydroxyoctadecanoylcarnitine (C18OH)         | LC-MS/MS, pos | 7.78 | 444.4 -> 85.0 | 135 | 25 | <sup>13</sup> C <sub>6</sub> , <sup>15</sup> N-Leucine | D <sub>3</sub> -C16 carnitine |
| Oleylcarnitine (C18:1)                         | LC-MS/MS, pos | 7.91 | 426.4 -> 85.0 | 135 | 25 | <sup>13</sup> C <sub>6</sub> , <sup>15</sup> N-Leucine | D <sub>3</sub> -C16 carnitine |
| 3-Hydroxy-9-octadecenoylcarnitine (C18:1OH)    | LC-MS/MS, pos | 7.01 | 442.4 -> 85.0 | 135 | 25 | <sup>13</sup> C <sub>6</sub> , <sup>15</sup> N-Leucine | D <sub>3</sub> -C16 carnitine |
| Linoleylcarnitine(C18:2)                       | LC-MS/MS, pos | 7.18 | 424.4 -> 85.0 | 135 | 25 | <sup>13</sup> C <sub>6</sub> , <sup>15</sup> N-Leucine | D <sub>3</sub> -C16 carnitine |
| 3-Hydroxy-9,12-octadecenoylcarnitine (C18:2OH) | LC-MS/MS, pos | 6.49 | 440.4 -> 85.0 | 135 | 25 | <sup>13</sup> C <sub>6</sub> , <sup>15</sup> N-Leucine | D <sub>9</sub> -C14 carnitine |
| C20:4-carnitine                                | LC-MS/MS, pos | 7.11 | 448.4 -> 85.0 | 135 | 25 | <sup>13</sup> C <sub>6</sub> , <sup>15</sup> N-Leucine | D <sub>3</sub> -C16 carnitine |
| C20:5-carnitine                                | LC-MS/MS, pos | 6.66 | 446.4 -> 85.0 | 135 | 25 | <sup>13</sup> C <sub>6</sub> , <sup>15</sup> N-Leucine | D <sub>9</sub> -C14 carnitine |
| C22:6-carnitine                                | LC-MS/MS, pos | 6.99 | 472.4 -> 85.0 | 135 | 25 | <sup>13</sup> C <sub>6</sub> , <sup>15</sup> N-Leucine | D <sub>9</sub> -C14 carnitine |

---

- Not applicable

Table S2. Metabolite concentrations ( $\mu\text{M}$ , Mean  $\pm$  SD) in controls stratified by fasting status, The Singapore Chinese Health Study

| Metabolite                                    | Non-fasting<br>(n =228) | Fasting<br>(n = 76) | <i>P</i> <sup>a</sup> |
|-----------------------------------------------|-------------------------|---------------------|-----------------------|
| <i>Inositol and lysophosphatidylinositols</i> |                         |                     |                       |
| <i>myo</i> -Inositol                          | 27.44 $\pm$ 9.12        | 27.54 $\pm$ 11.91   | 0.948                 |
| Lysophosphatidylinositol (LPI) (16:0)         | 0.28 $\pm$ 0.11         | 0.27 $\pm$ 0.10     | 0.316                 |
| LPI (16:1)                                    | 0.08 $\pm$ 0.04         | 0.09 $\pm$ 0.04     | 0.684                 |
| LPI (18:0)                                    | 1.19 $\pm$ 0.32         | 1.12 $\pm$ 0.29     | 0.095                 |
| LPI (18:1)                                    | 0.51 $\pm$ 0.18         | 0.51 $\pm$ 0.20     | 0.994                 |
| LPI (18:2)                                    | 0.47 $\pm$ 0.16         | 0.46 $\pm$ 0.13     | 0.621                 |
| LPI (20:4)                                    | 0.40 $\pm$ 0.11         | 0.42 $\pm$ 0.11     | 0.322                 |
| LPI (22:6)                                    | 0.06 $\pm$ 0.02         | 0.06 $\pm$ 0.02     | 0.692                 |
| <i>Fatty acids</i>                            |                         |                     |                       |
| Lauric acid (12:0)                            | 5.90 $\pm$ 4.81         | 4.94 $\pm$ 2.15     | 0.018                 |
| Myristic acid (14:0)                          | 7.44 $\pm$ 4.06         | 8.93 $\pm$ 2.84     | 0.001                 |
| Palmitic acid (16:0)                          | 63.09 $\pm$ 48.73       | 104.06 $\pm$ 45.58  | <0.001                |
| Palmitoleic acid (16:1n-7)                    | 11.47 $\pm$ 10.88       | 21.85 $\pm$ 11.37   | <0.001                |
| Stearic acid (18:0)                           | 14.37 $\pm$ 8.80        | 19.12 $\pm$ 6.45    | <0.001                |
| Oleic acid (18:1n-9)                          | 65.3 $\pm$ 54.42        | 114.31 $\pm$ 53.70  | <0.001                |
| Linoleic acid (18:2n-6)                       | 40.91 $\pm$ 29.62       | 63.29 $\pm$ 28.85   | <0.001                |
| $\alpha$ -Linolenic acid (18:3n-3)            | 3.36 $\pm$ 1.29         | 3.91 $\pm$ 1.26     | 0.001                 |
| $\gamma$ -Linolenic acid (18:3n-6)            | 2.47 $\pm$ 0.55         | 2.66 $\pm$ 0.61     | 0.022                 |
| Gondoic acid (20:1n-11)                       | 0.71 $\pm$ 0.55         | 1.11 $\pm$ 0.52     | <0.001                |
| Eicosadienoic acid (20:2n-6)                  | 6.14 $\pm$ 3.45         | 9.63 $\pm$ 3.71     | <0.001                |
| Dihomo- $\gamma$ -linolenic acid (20:3n-6)    | 7.36 $\pm$ 3.50         | 10.22 $\pm$ 4.08    | <0.001                |
| Mead acid (20:3n-9)                           | 1.41 $\pm$ 0.86         | 2.15 $\pm$ 1.14     | <0.001                |
| Arachidonic acid (20:4n-6)                    | 4.81 $\pm$ 1.99         | 6.29 $\pm$ 2.45     | <0.001                |
| Eicosapentaenoic acid (EPA) (20:5n-3)         | 0.85 $\pm$ 0.44         | 0.95 $\pm$ 0.49     | 0.113                 |
| Adrenic acid (22:4n-6)                        | 3.00 $\pm$ 1.66         | 4.47 $\pm$ 2.04     | <0.001                |
| Clupanodonic acid (22:5n-3)                   | 8.04 $\pm$ 5.67         | 12.11 $\pm$ 6.35    | <0.001                |
| Osbond acid (22:5n-6)                         | 5.37 $\pm$ 3.01         | 8.29 $\pm$ 3.79     | <0.001                |
| Docosahexaenoic acid (DHA) (22:6n-3)          | 21.87 $\pm$ 11.66       | 29.55 $\pm$ 13.69   | <0.001                |
| <i>Carnitine and acylcarnitines</i>           |                         |                     |                       |
| L-Carnitine                                   | 31.88 $\pm$ 6.22        | 32.00 $\pm$ 6.21    | 0.886                 |
| Acetylcarnitine (C2)                          | 4.78 $\pm$ 1.48         | 5.75 $\pm$ 2.07     | <0.001                |
| Propionylcarnitine (C3)                       | 0.44 $\pm$ 0.15         | 0.38 $\pm$ 0.11     | <0.001                |
| Butyrylcarnitine (C4)                         | 0.33 $\pm$ 0.07         | 0.32 $\pm$ 0.07     | 0.115                 |
| 3-Hydroxybutyrylcarnitine(C4OH)               | 0.04 $\pm$ 0.01         | 0.05 $\pm$ 0.02     | 0.007                 |
| Valerylcarnitine (C5)                         | 0.21 $\pm$ 0.03         | 0.20 $\pm$ 0.03     | 0.063                 |
| 3-Hydroxyisovalerylcarnitine (C5OH)           | 0.05 $\pm$ 0.01         | 0.05 $\pm$ 0.01     | 0.943                 |
| Hexanoylcarnitine (C6)                        | 0.20 $\pm$ 0.03         | 0.24 $\pm$ 0.05     | <0.001                |
| 3-Hydroxyhexanoylcarnitine (C6OH)             | 0.13 $\pm$ 0.00         | 0.13 $\pm$ 0.00     | 0.018                 |
| Octanoylcarnitine (C8)                        | 0.12 $\pm$ 0.06         | 0.22 $\pm$ 0.11     | <0.001                |

|                                                |             |             |        |
|------------------------------------------------|-------------|-------------|--------|
| 3-Hydroxyoctanoylcarnitine (C8OH)              | 0.05 ± 0.02 | 0.06 ± 0.02 | <0.001 |
| Decanoylcarnitine (C10)                        | 0.02 ± 0.12 | 0.39 ± 0.21 | <0.001 |
| 3-Hydroxydecanoylcarnitine (C10OH)             | 0.04 ± 0.01 | 0.05 ± 0.02 | <0.001 |
| 9-Decenoylcarnitine (C10:1)                    | 0.15 ± 0.07 | 0.22 ± 0.09 | <0.001 |
| Dodecanoylcarnitine (C12)                      | 0.09 ± 0.04 | 0.13 ± 0.06 | <0.001 |
| 3-Hydroxydodecanoylcarnitine (C12OH)           | 0.02 ± 0.00 | 0.03 ± 0.00 | <0.001 |
| 2-Dodecenoylcarnitine (C12:1)                  | 0.09 ± 0.04 | 0.14 ± 0.06 | <0.001 |
| Tetradecanoylcarnitine (C14)                   | 0.04 ± 0.01 | 0.05 ± 0.01 | <0.001 |
| 3-Hydroxytetradecanoylcarnitine(C14OH)         | 0.01 ± 0.00 | 0.01 ± 0.00 | <0.001 |
| 2-Tetradecenoylcarnitine (C14:1)               | 0.07 ± 0.04 | 0.12 ± 0.06 | <0.001 |
| Hexadecanoylcarnitine (C16)                    | 0.27 ± 0.04 | 0.30 ± 0.04 | <0.001 |
| 3-Hydroxyhexadecanoylcarnitine (C16OH)         | 0.01 ± 0.00 | 0.01 ± 0.00 | <0.001 |
| 9-Hexadecenoylcarnitine (C16:1)                | 0.04 ± 0.01 | 0.05 ± 0.02 | <0.001 |
| 3-Hydroxy-9-hexadecenoylcarnitine (C16:1OH)    | 0.01 ± 0.00 | 0.01 ± 0.00 | <0.001 |
| 9,12-Hexadecadienoylcarnitine (C16:2)          | 0.01 ± 0.00 | 0.02 ± 0.00 | <0.001 |
| Octadecanoylcarnitine (C18)                    | 0.18 ± 0.01 | 0.19 ± 0.01 | 0.009  |
| 3-Hydroxyoctadecanoylcarnitine (C18OH)         | 0.15 ± 0.00 | 0.15 ± 0.00 | 0.027  |
| Oleylcarnitine (C18:1)                         | 0.27 ± 0.04 | 0.31 ± 0.06 | <0.001 |
| 3-Hydroxy-9-octadecenoylcarnitine (C18:1OH)    | 0.15 ± 0.00 | 0.15 ± 0.00 | <0.001 |
| Linoleylcarnitine(C18:2)                       | 0.20 ± 0.02 | 0.21 ± 0.02 | 0.001  |
| 3-Hydroxy-9,12-octadecenoylcarnitine (C18:2OH) | 0.01 ± 0.00 | 0.01 ± 0.00 | <0.001 |
| C20:4-carnitine                                | 0.15 ± 0.00 | 0.15 ± 0.00 | 0.005  |
| C20:5-carnitine                                | 0.01 ± 0.00 | 0.01 ± 0.00 | 0.001  |
| C22:6-carnitine                                | 0.01 ± 0.00 | 0.01 ± 0.00 | <0.001 |

---

<sup>a</sup> *P* values were calculated by the Student *t* test.

Table S3. The associations between 61 measured metabolites and risk of type 2 diabetes, The Singapore Chinese Health Study <sup>a</sup>

| Metabolite                                    | Groups                    | OR across tertiles |                    |                    |             | OR per SD increment |                   |        |       |
|-----------------------------------------------|---------------------------|--------------------|--------------------|--------------------|-------------|---------------------|-------------------|--------|-------|
|                                               |                           | T1                 | T2, OR (95% CI)    | T3, OR (95% CI)    | P for trend | FDR                 | OR (95% CI)       | P      | FDR   |
| <i>Inositol and lysophosphatidylinositols</i> |                           |                    |                    |                    |             |                     |                   |        |       |
| <i>myo</i> -Inositol                          | Prevalent type 2 diabetes | 1.00               | 0.86 (0.43, 1.74)  | 0.27 (0.12, 0.65)  | 0.003       | 0.016               | 0.38 (0.23, 0.61) | <0.001 | 0.003 |
|                                               | Incident type 2 diabetes  | 1.00               | 0.41 (0.18, 0.92)  | 0.40 (0.16, 0.98)  | 0.038       | 0.136               | 0.73 (0.51, 1.05) | 0.089  | 0.249 |
| Lysophosphatidylinositol (16:0)               | Prevalent type 2 diabetes | 1.00               | 1.69 (0.81, 3.54)  | 2.02 (0.94, 4.37)  | 0.041       | 0.089               | 1.20 (0.88, 1.64) | 0.257  | 0.306 |
|                                               | Incident type 2 diabetes  | 1.00               | 0.80 (0.39, 1.63)  | 1.24 (0.58, 2.65)  | 0.693       | 0.798               | 1.51 (1.02, 2.24) | 0.041  | 0.142 |
| Lysophosphatidylinositol (16:1)               | Prevalent type 2 diabetes | 1.00               | 1.35 (0.51, 3.57)  | 2.53 (1.05, 6.06)  | 0.016       | 0.041               | 1.24 (0.87, 1.78) | 0.228  | 0.278 |
|                                               | Incident type 2 diabetes  | 1.00               | 1.70 (0.43, 6.75)  | 5.33 (1.53, 18.59) | 0.016       | 0.104               | 1.96 (1.15, 3.34) | 0.013  | 0.085 |
| Lysophosphatidylinositol (18:0)               | Prevalent type 2 diabetes | 1.00               | 1.84 (0.76, 4.46)  | 2.99 (1.05, 8.52)  | 0.053       | 0.095               | 1.51 (0.95, 2.39) | 0.079  | 0.142 |
|                                               | Incident type 2 diabetes  | 1.00               | 1.19 (0.53, 2.68)  | 3.24 (1.29, 8.10)  | 0.008       | 0.104               | 1.97 (1.24, 3.12) | 0.004  | 0.081 |
| Lysophosphatidylinositol (18:1)               | Prevalent type 2 diabetes | 1.00               | 1.45 (0.70, 2.99)  | 1.84 (0.91, 3.70)  | 0.065       | 0.110               | 1.23 (0.93, 1.64) | 0.142  | 0.201 |
|                                               | Incident type 2 diabetes  | 1.00               | 0.86 (0.42, 1.77)  | 1.01 (0.49, 2.08)  | 0.855       | 0.893               | 1.06 (0.75, 1.50) | 0.732  | 0.812 |
| Lysophosphatidylinositol (18:2)               | Prevalent type 2 diabetes | 1.00               | 2.32 (1.07, 5.01)  | 2.78 (1.29, 5.98)  | 0.007       | 0.024               | 1.30 (0.98, 1.71) | 0.066  | 0.126 |
|                                               | Incident type 2 diabetes  | 1.00               | 1.52 (0.66, 3.51)  | 2.04 (0.88, 4.72)  | 0.140       | 0.275               | 1.26 (0.91, 1.74) | 0.168  | 0.342 |
| Lysophosphatidylinositol (20:4)               | Prevalent type 2 diabetes | 1.00               | 1.83 (0.75, 4.48)  | 4.05 (1.71, 9.57)  | 0.001       | 0.009               | 2.36 (1.57, 3.55) | <0.001 | 0.003 |
|                                               | Incident type 2 diabetes  | 1.00               | 1.15 (0.59, 2.23)  | 1.13 (0.50, 2.57)  | 0.773       | 0.842               | 1.32 (0.90, 1.96) | 0.157  | 0.330 |
| Lysophosphatidylinositol (22:6)               | Prevalent type 2 diabetes | 1.00               | 1.86 (0.85, 4.09)  | 2.02 (0.82, 4.97)  | 0.044       | 0.093               | 1.30 (0.93, 1.83) | 0.129  | 0.192 |
|                                               | Incident type 2 diabetes  | 1.00               | 0.51 (0.23, 1.13)  | 0.83 (0.36, 1.92)  | 0.765       | 0.842               | 0.98 (0.68, 1.41) | 0.913  | 0.916 |
| <i>Fatty acids</i>                            |                           |                    |                    |                    |             |                     |                   |        |       |
| Lauric acid (C12:0)                           | Prevalent type 2 diabetes | 1.00               | 0.85 (0.41, 1.77)  | 2.28 (0.95, 5.47)  | 0.269       | 0.346               | 0.99 (0.73, 1.35) | 0.966  | 0.966 |
|                                               | Incident type 2 diabetes  | 1.00               | 0.88 (0.44, 1.75)  | 1.31 (0.63, 2.72)  | 0.601       | 0.748               | 1.15 (0.86, 1.52) | 0.344  | 0.456 |
| Myristic acid (C14:0)                         | Prevalent type 2 diabetes | 1.00               | 0.90 (0.35, 2.28)  | 3.15 (1.38, 7.20)  | 0.007       | 0.024               | 2.04 (1.37, 3.04) | <0.001 | 0.003 |
|                                               | Incident type 2 diabetes  | 1.00               | 1.10 (0.58, 2.08)  | 2.10 (1.07, 4.13)  | 0.067       | 0.178               | 1.72 (1.25, 2.37) | 0.001  | 0.031 |
| Palmitic acid (C16:0)                         | Prevalent type 2 diabetes | 1.00               | 2.76 (1.11, 6.86)  | 6.45 (2.52, 16.51) | 0.001       | 0.009               | 2.18 (1.50, 3.17) | <0.001 | 0.003 |
|                                               | Incident type 2 diabetes  | 1.00               | 1.62 (0.81, 3.23)  | 2.79 (1.33, 5.86)  | 0.014       | 0.104               | 1.48 (1.10, 1.99) | 0.010  | 0.085 |
| Palmitoleic acid (C16:1n-7)                   | Prevalent type 2 diabetes | 1.00               | 4.43 (1.75, 11.26) | 7.70 (2.69, 22.02) | 0.002       | 0.014               | 1.90 (1.29, 2.81) | 0.001  | 0.003 |
|                                               | Incident type 2 diabetes  | 1.00               | 1.20 (0.58, 2.48)  | 2.32 (1.19, 4.55)  | 0.026       | 0.118               | 1.44 (1.08, 1.92) | 0.013  | 0.085 |
| Stearic acid (C18:0)                          | Prevalent type 2 diabetes | 1.00               | 2.98 (1.25, 7.13)  | 4.74 (2.06, 10.88) | 0.002       | 0.014               | 2.13 (1.45, 3.12) | <0.001 | 0.003 |



|                                        |                           |      |                    |                    |        |       |                   |        |       |  |
|----------------------------------------|---------------------------|------|--------------------|--------------------|--------|-------|-------------------|--------|-------|--|
|                                        | Incident type 2 diabetes  | 1.00 | 1.68 (0.80, 3.50)  | 3.03 (1.37, 6.71)  | 0.011  | 0.104 | 1.59 (1.13, 2.23) | 0.008  | 0.085 |  |
| Oleic acid (C18:1n-9)                  | Prevalent type 2 diabetes | 1.00 | 2.38 (0.97, 5.85)  | 4.44 (1.82, 10.79) | 0.009  | 0.026 | 1.93 (1.35, 2.76) | <0.001 | 0.003 |  |
|                                        | Incident type 2 diabetes  | 1.00 | 1.93 (0.93, 4.00)  | 2.76 (1.32, 5.79)  | 0.017  | 0.104 | 1.38 (1.04, 1.84) | 0.028  | 0.114 |  |
| Linoleic acid (C18:2n-6)               | Prevalent type 2 diabetes | 1.00 | 2.04 (0.91, 4.59)  | 4.61 (1.94, 10.98) | 0.004  | 0.016 | 1.65 (1.19, 2.27) | 0.002  | 0.006 |  |
|                                        | Incident type 2 diabetes  | 1.00 | 1.48 (0.73, 3.00)  | 2.19 (1.11, 4.34)  | 0.047  | 0.159 | 1.39 (1.05, 1.85) | 0.022  | 0.112 |  |
| $\alpha$ -Linolenic acid (C18:3n-3)    | Prevalent type 2 diabetes | 1.00 | 1.48 (0.67, 3.30)  | 3.20 (1.43, 7.15)  | 0.018  | 0.044 | 1.54 (1.11, 2.14) | 0.009  | 0.022 |  |
|                                        | Incident type 2 diabetes  | 1.00 | 1.39 (0.72, 2.67)  | 1.81 (0.88, 3.73)  | 0.190  | 0.305 | 1.28 (0.95, 1.73) | 0.109  | 0.277 |  |
| $\gamma$ -Linolenic acid (C18:3n-6)    | Prevalent type 2 diabetes | 1.00 | 5.91 (2.18, 15.99) | 5.46 (1.85, 16.10) | 0.012  | 0.032 | 2.07 (1.35, 3.17) | 0.001  | 0.003 |  |
|                                        | Incident type 2 diabetes  | 1.00 | 1.56 (0.69, 3.54)  | 2.21 (0.98, 5.00)  | 0.106  | 0.233 | 1.36 (0.98, 1.90) | 0.064  | 0.195 |  |
| Gondoic acid (C20:1n-11)               | Prevalent type 2 diabetes | 1.00 | 1.23 (0.53, 2.84)  | 3.54 (1.57, 8.02)  | 0.008  | 0.026 | 2.20 (1.48, 3.28) | <0.001 | 0.003 |  |
|                                        | Incident type 2 diabetes  | 1.00 | 1.34 (0.67, 2.68)  | 2.28 (1.07, 4.87)  | 0.054  | 0.165 | 1.41 (1.05, 1.90) | 0.024  | 0.113 |  |
| Eicosadienoic acid (C20:2n-6)          | Prevalent type 2 diabetes | 1.00 | 3.33 (1.39, 8.00)  | 6.64 (2.72, 16.23) | <0.001 | 0.009 | 2.29 (1.55, 3.38) | <0.001 | 0.003 |  |
|                                        | Incident type 2 diabetes  | 1.00 | 2.41 (1.13, 5.11)  | 3.11 (1.45, 6.68)  | 0.010  | 0.104 | 1.50 (1.12, 2.02) | 0.006  | 0.085 |  |
| Dihomo-gamma-linolenic acid (C20:3n-6) | Prevalent type 2 diabetes | 1.00 | 1.35 (0.57, 3.19)  | 5.02 (2.16, 11.69) | <0.001 | 0.009 | 2.20 (1.52, 3.20) | <0.001 | 0.003 |  |
|                                        | Incident type 2 diabetes  | 1.00 | 1.56 (0.70, 3.50)  | 5.64 (2.38, 13.34) | <0.001 | 0.031 | 1.86 (1.34, 2.59) | <0.001 | 0.031 |  |
| Mead acid (C20:3n-9)                   | Prevalent type 2 diabetes | 1.00 | 1.76 (0.75, 4.12)  | 3.14 (1.40, 7.02)  | 0.031  | 0.070 | 2.03 (1.40, 2.96) | <0.001 | 0.003 |  |
|                                        | Incident type 2 diabetes  | 1.00 | 2.66 (1.13, 6.31)  | 4.91 (1.95, 12.32) | 0.001  | 0.031 | 1.36 (1.02, 1.83) | 0.039  | 0.142 |  |
| Arachidonic acid (C20:4n-6)            | Prevalent type 2 diabetes | 1.00 | 1.82 (0.77, 4.32)  | 3.86 (1.70, 8.75)  | 0.004  | 0.016 | 1.84 (1.31, 2.58) | <0.001 | 0.003 |  |
|                                        | Incident type 2 diabetes  | 1.00 | 1.81 (0.86, 3.81)  | 2.21 (1.00, 4.86)  | 0.093  | 0.218 | 1.53 (1.09, 2.14) | 0.014  | 0.085 |  |
| Eicosapentaenoic acid (EPA) (C20:5n-3) | Prevalent type 2 diabetes | 1.00 | 3.96 (1.50, 10.48) | 4.34 (1.76, 10.73) | 0.009  | 0.026 | 1.61 (1.17, 2.23) | 0.004  | 0.012 |  |
|                                        | Incident type 2 diabetes  | 1.00 | 1.11 (0.50, 2.47)  | 1.22 (0.58, 2.58)  | 0.668  | 0.784 | 1.10 (0.82, 1.49) | 0.520  | 0.622 |  |
| Adrenic acid (C22:4n-6)                | Prevalent type 2 diabetes | 1.00 | 3.14 (1.23, 8.02)  | 6.87 (2.69, 17.54) | <0.001 | 0.009 | 2.52 (1.66, 3.84) | <0.001 | 0.003 |  |
|                                        | Incident type 2 diabetes  | 1.00 | 1.86 (0.82, 4.25)  | 3.41 (1.51, 7.70)  | 0.016  | 0.104 | 1.53 (1.11, 2.11) | 0.010  | 0.085 |  |
| Clupanodonic acid (C22:5n-3)           | Prevalent type 2 diabetes | 1.00 | 1.66 (0.71, 3.92)  | 4.79 (2.00, 11.47) | 0.001  | 0.009 | 2.16 (1.49, 3.12) | <0.001 | 0.003 |  |
|                                        | Incident type 2 diabetes  | 1.00 | 1.13 (0.57, 2.25)  | 2.30 (1.15, 4.61)  | 0.032  | 0.130 | 1.32 (0.99, 1.75) | 0.058  | 0.186 |  |
| Osbond acid (C22:5n-6)                 | Prevalent type 2 diabetes | 1.00 | 1.51 (0.66, 3.44)  | 4.20 (1.85, 9.52)  | 0.003  | 0.016 | 2.41 (1.62, 3.57) | <0.001 | 0.003 |  |
|                                        | Incident type 2 diabetes  | 1.00 | 0.73 (0.37, 1.46)  | 1.64 (0.81, 3.34)  | 0.279  | 0.414 | 1.43 (1.05, 1.94) | 0.022  | 0.112 |  |
| Docosahexaenoic acid (DHA) (C22:6n-3)  | Prevalent type 2 diabetes | 1.00 | 2.30 (1.01, 5.21)  | 4.20 (1.83, 9.66)  | 0.004  | 0.016 | 1.98 (1.41, 2.78) | <0.001 | 0.003 |  |
|                                        | Incident type 2 diabetes  | 1.00 | 0.84 (0.42, 1.68)  | 1.51 (0.74, 3.06)  | 0.396  | 0.525 | 1.22 (0.91, 1.62) | 0.180  | 0.344 |  |
| <i>Carnitine and acylcarnitines</i>    |                           |      |                    |                    |        |       |                   |        |       |  |
| L-Carnitine                            | Prevalent type 2 diabetes | 1.00 | 0.39 (0.19, 0.78)  | 0.17 (0.06, 0.44)  | <0.001 | 0.009 | 0.57 (0.40, 0.81) | 0.002  | 0.006 |  |

|                                      |                           |      |                   |                   |       |       |                   |       |       |
|--------------------------------------|---------------------------|------|-------------------|-------------------|-------|-------|-------------------|-------|-------|
|                                      | Incident type 2 diabetes  | 1.00 | 0.80 (0.39, 1.62) | 0.51 (0.23, 1.15) | 0.133 | 0.270 | 0.77 (0.54, 1.09) | 0.135 | 0.317 |
| Acetylcarnitine (C2)                 | Prevalent type 2 diabetes | 1.00 | 1.19 (0.58, 2.42) | 1.42 (0.65, 3.08) | 0.712 | 0.749 | 1.05 (0.76, 1.46) | 0.746 | 0.785 |
|                                      | Incident type 2 diabetes  | 1.00 | 1.47 (0.72, 3.01) | 2.03 (1.03, 3.98) | 0.061 | 0.177 | 1.09 (0.85, 1.40) | 0.514 | 0.622 |
| Propionylcarnitine (C3)              | Prevalent type 2 diabetes | 1.00 | 0.98 (0.50, 1.93) | 0.60 (0.28, 1.29) | 0.418 | 0.481 | 0.78 (0.56, 1.10) | 0.156 | 0.216 |
|                                      | Incident type 2 diabetes  | 1.00 | 0.96 (0.46, 1.99) | 1.19 (0.58, 2.47) | 0.481 | 0.611 | 1.04 (0.75, 1.44) | 0.796 | 0.867 |
| Butyrylcarnitine (C4)                | Prevalent type 2 diabetes | 1.00 | 0.56 (0.26, 1.20) | 0.60 (0.29, 1.23) | 0.297 | 0.357 | 0.86 (0.63, 1.16) | 0.308 | 0.348 |
|                                      | Incident type 2 diabetes  | 1.00 | 0.83 (0.42, 1.65) | 1.26 (0.63, 2.53) | 0.464 | 0.602 | 1.13 (0.81, 1.57) | 0.466 | 0.580 |
| 3-Hydroxybutyrylcarnitine(C4OH)      | Prevalent type 2 diabetes | 1.00 | 1.33 (0.61, 2.91) | 3.22 (1.48, 7.03) | 0.011 | 0.031 | 1.46 (1.10, 1.95) | 0.009 | 0.022 |
|                                      | Incident type 2 diabetes  | 1.00 | 3.82 (1.75, 8.30) | 3.15 (1.45, 6.87) | 0.017 | 0.104 | 1.14 (0.87, 1.49) | 0.329 | 0.446 |
| Valerylcarnitine (C5)                | Prevalent type 2 diabetes | 1.00 | 0.91 (0.39, 2.12) | 1.57 (0.69, 3.53) | 0.069 | 0.114 | 1.23 (0.88, 1.71) | 0.220 | 0.274 |
|                                      | Incident type 2 diabetes  | 1.00 | 2.36 (1.14, 4.85) | 1.70 (0.82, 3.53) | 0.117 | 0.246 | 1.27 (0.89, 1.81) | 0.189 | 0.344 |
| 3-Hydroxyisovalerylcarnitine (C5OH)  | Prevalent type 2 diabetes | 1.00 | 0.87 (0.43, 1.78) | 2.04 (1.00, 4.17) | 0.065 | 0.110 | 1.28 (0.94, 1.75) | 0.117 | 0.183 |
|                                      | Incident type 2 diabetes  | 1.00 | 0.93 (0.46, 1.88) | 1.13 (0.50, 2.53) | 0.911 | 0.911 | 0.94 (0.73, 1.21) | 0.630 | 0.725 |
| Hexanoylcarnitine (C6)               | Prevalent type 2 diabetes | 1.00 | 1.39 (0.68, 2.83) | 2.42 (1.12, 5.23) | 0.140 | 0.203 | 1.24 (0.89, 1.72) | 0.197 | 0.250 |
|                                      | Incident type 2 diabetes  | 1.00 | 1.73 (0.91, 3.29) | 1.60 (0.79, 3.23) | 0.332 | 0.460 | 1.17 (0.89, 1.54) | 0.255 | 0.409 |
| 3-Hydroxyhexanoylcarnitine (C6OH)    | Prevalent type 2 diabetes | 1.00 | 1.04 (0.48, 2.24) | 1.10 (0.54, 2.26) | 0.880 | 0.880 | 1.09 (0.80, 1.48) | 0.603 | 0.657 |
|                                      | Incident type 2 diabetes  | 1.00 | 1.41 (0.72, 2.74) | 2.26 (1.13, 4.51) | 0.034 | 0.130 | 1.14 (0.88, 1.49) | 0.316 | 0.438 |
| Octanoylcarnitine (C8)               | Prevalent type 2 diabetes | 1.00 | 1.63 (0.76, 3.49) | 3.13 (1.37, 7.18) | 0.050 | 0.095 | 1.23 (0.91, 1.68) | 0.181 | 0.235 |
|                                      | Incident type 2 diabetes  | 1.00 | 1.42 (0.70, 2.90) | 2.04 (1.03, 4.03) | 0.091 | 0.218 | 1.14 (0.85, 1.52) | 0.376 | 0.488 |
| 3-Hydroxyoctanoylcarnitine (C8OH)    | Prevalent type 2 diabetes | 1.00 | 1.51 (0.74, 3.09) | 2.13 (1.01, 4.49) | 0.253 | 0.346 | 1.30 (0.94, 1.80) | 0.109 | 0.180 |
|                                      | Incident type 2 diabetes  | 1.00 | 1.48 (0.69, 3.20) | 1.84 (0.91, 3.70) | 0.173 | 0.293 | 1.23 (0.93, 1.63) | 0.143 | 0.323 |
| Decanoylcarnitine (C10)              | Prevalent type 2 diabetes | 1.00 | 1.59 (0.75, 3.33) | 3.01 (1.33, 6.80) | 0.052 | 0.095 | 1.24 (0.91, 1.68) | 0.175 | 0.232 |
|                                      | Incident type 2 diabetes  | 1.00 | 1.85 (0.92, 3.72) | 1.93 (0.97, 3.83) | 0.153 | 0.288 | 1.17 (0.88, 1.55) | 0.285 | 0.424 |
| 3-Hydroxydecanoylcarnitine (C10OH)   | Prevalent type 2 diabetes | 1.00 | 1.20 (0.59, 2.46) | 2.19 (1.02, 4.71) | 0.270 | 0.346 | 1.28 (0.94, 1.75) | 0.122 | 0.186 |
|                                      | Incident type 2 diabetes  | 1.00 | 1.19 (0.58, 2.45) | 1.66 (0.84, 3.27) | 0.285 | 0.414 | 1.23 (0.93, 1.62) | 0.149 | 0.325 |
| 9-Decenoylcarnitine (C10:1)          | Prevalent type 2 diabetes | 1.00 | 1.07 (0.54, 2.10) | 1.86 (0.92, 3.78) | 0.272 | 0.346 | 1.21 (0.92, 1.61) | 0.175 | 0.232 |
|                                      | Incident type 2 diabetes  | 1.00 | 1.39 (0.70, 2.76) | 1.37 (0.71, 2.66) | 0.623 | 0.760 | 1.15 (0.88, 1.51) | 0.303 | 0.436 |
| Dodecanoylcarnitine (C12)            | Prevalent type 2 diabetes | 1.00 | 1.43 (0.70, 2.92) | 2.86 (1.28, 6.41) | 0.053 | 0.095 | 1.35 (0.97, 1.88) | 0.074 | 0.137 |
|                                      | Incident type 2 diabetes  | 1.00 | 2.34 (1.10, 4.98) | 2.31 (1.10, 4.84) | 0.067 | 0.178 | 1.27 (0.96, 1.68) | 0.094 | 0.249 |
| 3-Hydroxydodecanoylcarnitine (C12OH) | Prevalent type 2 diabetes | 1.00 | 1.22 (0.58, 2.56) | 2.56 (1.16, 5.63) | 0.077 | 0.120 | 1.54 (1.12, 2.12) | 0.008 | 0.021 |
|                                      | Incident type 2 diabetes  | 1.00 | 1.58 (0.79, 3.18) | 2.23 (1.10, 4.54) | 0.051 | 0.164 | 1.38 (1.04, 1.82) | 0.026 | 0.113 |

|                                                |                           |      |                    |                    |       |       |                   |       |       |
|------------------------------------------------|---------------------------|------|--------------------|--------------------|-------|-------|-------------------|-------|-------|
| 2-Dodecenoylcarnitine (C12:1)                  | Prevalent type 2 diabetes | 1.00 | 1.39 (0.65, 2.96)  | 2.12 (1.00, 4.47)  | 0.299 | 0.357 | 1.30 (0.94, 1.80) | 0.115 | 0.183 |
|                                                | Incident type 2 diabetes  | 1.00 | 1.32 (0.67, 2.59)  | 1.78 (0.92, 3.42)  | 0.199 | 0.311 | 1.16 (0.89, 1.51) | 0.266 | 0.416 |
| Tetradecanoylcarnitine (C14)                   | Prevalent type 2 diabetes | 1.00 | 1.16 (0.55, 2.43)  | 4.79 (1.99, 11.52) | 0.005 | 0.019 | 1.54 (1.11, 2.15) | 0.011 | 0.025 |
|                                                | Incident type 2 diabetes  | 1.00 | 2.54 (1.23, 5.23)  | 2.59 (1.27, 5.26)  | 0.027 | 0.118 | 1.35 (1.01, 1.79) | 0.042 | 0.142 |
| 3-Hydroxytetradecanoylcarnitine(C14OH)         | Prevalent type 2 diabetes | 1.00 | 1.39 (0.62, 3.09)  | 3.30 (1.59, 6.85)  | 0.004 | 0.016 | 1.83 (1.29, 2.60) | 0.001 | 0.003 |
|                                                | Incident type 2 diabetes  | 1.00 | 1.30 (0.64, 2.63)  | 2.08 (0.98, 4.40)  | 0.075 | 0.191 | 1.27 (0.96, 1.69) | 0.092 | 0.249 |
| 2-Tetradecenoylcarnitine (C14:1)               | Prevalent type 2 diabetes | 1.00 | 2.70 (1.27, 5.71)  | 3.14 (1.33, 7.41)  | 0.075 | 0.120 | 1.40 (1.00, 1.96) | 0.052 | 0.106 |
|                                                | Incident type 2 diabetes  | 1.00 | 1.32 (0.65, 2.67)  | 1.82 (0.92, 3.62)  | 0.188 | 0.305 | 1.20 (0.91, 1.58) | 0.201 | 0.344 |
| Hexadecanoylcarnitine (C16)                    | Prevalent type 2 diabetes | 1.00 | 1.73 (0.87, 3.43)  | 2.02 (0.95, 4.29)  | 0.157 | 0.223 | 1.56 (1.10, 2.21) | 0.013 | 0.028 |
|                                                | Incident type 2 diabetes  | 1.00 | 4.19 (1.71, 10.27) | 3.92 (1.50, 10.28) | 0.024 | 0.118 | 1.23 (0.88, 1.72) | 0.227 | 0.374 |
| 3-Hydroxyhexadecanoylcarnitine (C16OH)         | Prevalent type 2 diabetes | 1.00 | 1.58 (0.80, 3.12)  | 2.80 (1.28, 6.09)  | 0.029 | 0.068 | 1.54 (1.10, 2.14) | 0.011 | 0.025 |
|                                                | Incident type 2 diabetes  | 1.00 | 1.30 (0.70, 2.40)  | 1.89 (0.82, 4.35)  | 0.162 | 0.288 | 1.21 (0.91, 1.61) | 0.192 | 0.344 |
| 9-Hexadecenoylcarnitine (C16:1)                | Prevalent type 2 diabetes | 1.00 | 2.12 (1.05, 4.29)  | 2.22 (1.00, 4.92)  | 0.289 | 0.357 | 1.38 (0.99, 1.92) | 0.055 | 0.108 |
|                                                | Incident type 2 diabetes  | 1.00 | 1.62 (0.80, 3.28)  | 2.66 (1.28, 5.52)  | 0.021 | 0.116 | 1.20 (0.91, 1.58) | 0.203 | 0.344 |
| 3-Hydroxy-9-hexadecenoylcarnitine (C16:1OH)    | Prevalent type 2 diabetes | 1.00 | 1.81 (0.85, 3.46)  | 2.67 (1.16, 6.16)  | 0.094 | 0.140 | 1.58 (1.13, 2.20) | 0.007 | 0.019 |
|                                                | Incident type 2 diabetes  | 1.00 | 1.61 (0.84, 3.10)  | 1.73 (0.85, 3.50)  | 0.160 | 0.288 | 1.14 (0.88, 1.47) | 0.307 | 0.436 |
| 9,12-Hexadecadienoylcarnitine (C16:2)          | Prevalent type 2 diabetes | 1.00 | 1.98 (1.01, 3.89)  | 2.72 (1.18, 6.26)  | 0.086 | 0.131 | 1.32 (0.96, 1.80) | 0.088 | 0.153 |
|                                                | Incident type 2 diabetes  | 1.00 | 1.25 (0.63, 2.48)  | 1.57 (0.82, 2.98)  | 0.344 | 0.466 | 1.16 (0.88, 1.53) | 0.284 | 0.424 |
| Octadecanoylcarnitine (C18)                    | Prevalent type 2 diabetes | 1.00 | 1.55 (0.79, 3.04)  | 1.76 (0.79, 3.94)  | 0.256 | 0.346 | 1.18 (0.85, 1.64) | 0.324 | 0.359 |
|                                                | Incident type 2 diabetes  | 1.00 | 1.29 (0.65, 2.56)  | 1.07 (0.50, 2.31)  | 0.870 | 0.893 | 1.02 (0.74, 1.39) | 0.916 | 0.916 |
| 3-Hydroxyoctadecanoylcarnitine (C18OH)         | Prevalent type 2 diabetes | 1.00 | 1.34 (0.67, 2.69)  | 0.95 (0.32, 2.87)  | 0.820 | 0.834 | 1.06 (0.78, 1.45) | 0.698 | 0.747 |
|                                                | Incident type 2 diabetes  | 1.00 | 1.01 (0.53, 1.91)  | 0.85 (0.28, 2.59)  | 0.812 | 0.869 | 0.97 (0.71, 1.32) | 0.855 | 0.884 |
| Oleylcarnitine (C18:1)                         | Prevalent type 2 diabetes | 1.00 | 2.55 (1.19, 5.44)  | 1.80 (0.79, 4.12)  | 0.519 | 0.586 | 1.31 (0.95, 1.82) | 0.103 | 0.175 |
|                                                | Incident type 2 diabetes  | 1.00 | 2.53 (1.20, 5.33)  | 2.23 (1.02, 4.88)  | 0.107 | 0.233 | 1.06 (0.78, 1.43) | 0.726 | 0.812 |
| 3-Hydroxy-9-octadecenoylcarnitine (C18:1OH)    | Prevalent type 2 diabetes | 1.00 | 1.85 (0.91, 3.80)  | 2.03 (0.79, 5.21)  | 0.544 | 0.603 | 1.29 (0.92, 1.81) | 0.135 | 0.196 |
|                                                | Incident type 2 diabetes  | 1.00 | 2.36 (1.26, 4.44)  | 1.55 (0.67, 3.60)  | 0.165 | 0.288 | 1.25 (0.95, 1.65) | 0.116 | 0.283 |
| Linoleylcarnitine(C18:2)                       | Prevalent type 2 diabetes | 1.00 | 0.96 (0.50, 1.85)  | 1.02 (0.52, 2.04)  | 0.642 | 0.687 | 0.98 (0.73, 1.30) | 0.871 | 0.886 |
|                                                | Incident type 2 diabetes  | 1.00 | 2.23 (1.12, 4.43)  | 1.63 (0.73, 3.63)  | 0.249 | 0.380 | 1.03 (0.75, 1.42) | 0.845 | 0.884 |
| 3-Hydroxy-9,12-octadecenoylcarnitine (C18:2OH) | Prevalent type 2 diabetes | 1.00 | 1.88 (0.97, 3.64)  | 0.60 (0.11, 3.16)  | 0.808 | 0.834 | 1.19 (0.88, 1.60) | 0.261 | 0.306 |
|                                                | Incident type 2 diabetes  | 1.00 | 1.58 (0.88, 2.83)  | 1.23 (0.26, 5.82)  | 0.326 | 0.460 | 1.20 (0.91, 1.58) | 0.187 | 0.344 |
| C20:4-carnitine                                | Prevalent type 2 diabetes | 1.00 | 0.72 (0.34, 1.50)  | 0.97 (0.40, 2.34)  | 0.304 | 0.357 | 0.96 (0.71, 1.31) | 0.819 | 0.847 |

|                 |                           |      |                   |                    |       |       |                   |       |       |
|-----------------|---------------------------|------|-------------------|--------------------|-------|-------|-------------------|-------|-------|
|                 | Incident type 2 diabetes  | 1.00 | 1.00 (0.55, 1.81) | 0.80 (0.30, 2.13)  | 0.665 | 0.784 | 0.97 (0.70, 1.33) | 0.829 | 0.884 |
| C20:5-carnitine | Prevalent type 2 diabetes | 1.00 | 1.77 (0.92, 3.43) | 5.71 (1.05, 30.98) | 0.049 | 0.095 | 1.40 (1.03, 1.91) | 0.031 | 0.065 |
|                 | Incident type 2 diabetes  | 1.00 | 1.09 (0.58, 2.08) | 1.64 (0.41, 6.58)  | 0.746 | 0.842 | 1.14 (0.83, 1.56) | 0.427 | 0.543 |
| C22:6-carnitine | Prevalent type 2 diabetes | 1.00 | 1.30 (0.69, 2.46) | 1.74 (0.68, 4.45)  | 0.636 | 0.687 | 1.17 (0.88, 1.56) | 0.289 | 0.333 |
|                 | Incident type 2 diabetes  | 1.00 | 1.06 (0.57, 1.95) | 1.25 (0.49, 3.21)  | 0.878 | 0.893 | 1.08 (0.81, 1.45) | 0.607 | 0.712 |

<sup>a</sup>OR (95% CI) and *p* values were calculated by conditional logistic regression after adjustment for BMI, history of hypertension, smoking, physical activity, fasting status, triglycerides, and HDL-cholesterol.

Table S4: Reclassification of incident type 2 diabetes cases and matched controls with no categories based on their serum metabolites, The Singapore Chinese Health Study <sup>a</sup>

| Lysophosphatidylinositol (16:1)           | All | Assigned to<br>higher diabetes risk | Assigned to<br>lower diabetes risk | NRI                          |                      |
|-------------------------------------------|-----|-------------------------------------|------------------------------------|------------------------------|----------------------|
| Expected number of event participants     | 160 | 84                                  | 76                                 | Among event participants     | 4.5%                 |
| Expected number of non-event participants | 160 | 54                                  | 106                                | Among non-event participants | 32.8%                |
|                                           |     |                                     |                                    | Overall original (95% CI)    | 37.3% (12.5%, 62.1%) |
| Dihomo- $\gamma$ -linolenic acid          | All | Assigned to<br>higher diabetes risk | Assigned to<br>lower diabetes risk | NRI                          |                      |
| Expected number of event participants     | 160 | 84                                  | 76                                 | Among event participants     | 5.0%                 |
| Expected number of non-event participants | 160 | 53                                  | 107                                | Among non-event participants | 33.8%                |
|                                           |     |                                     |                                    | Overall original (95% CI)    | 38.8% (16.8%, 60.8%) |

<sup>a</sup> Multivariate model adjusted for BMI, history of hypertension, smoking, physical activity, fasting status, triglycerides, and HDL-cholesterol.

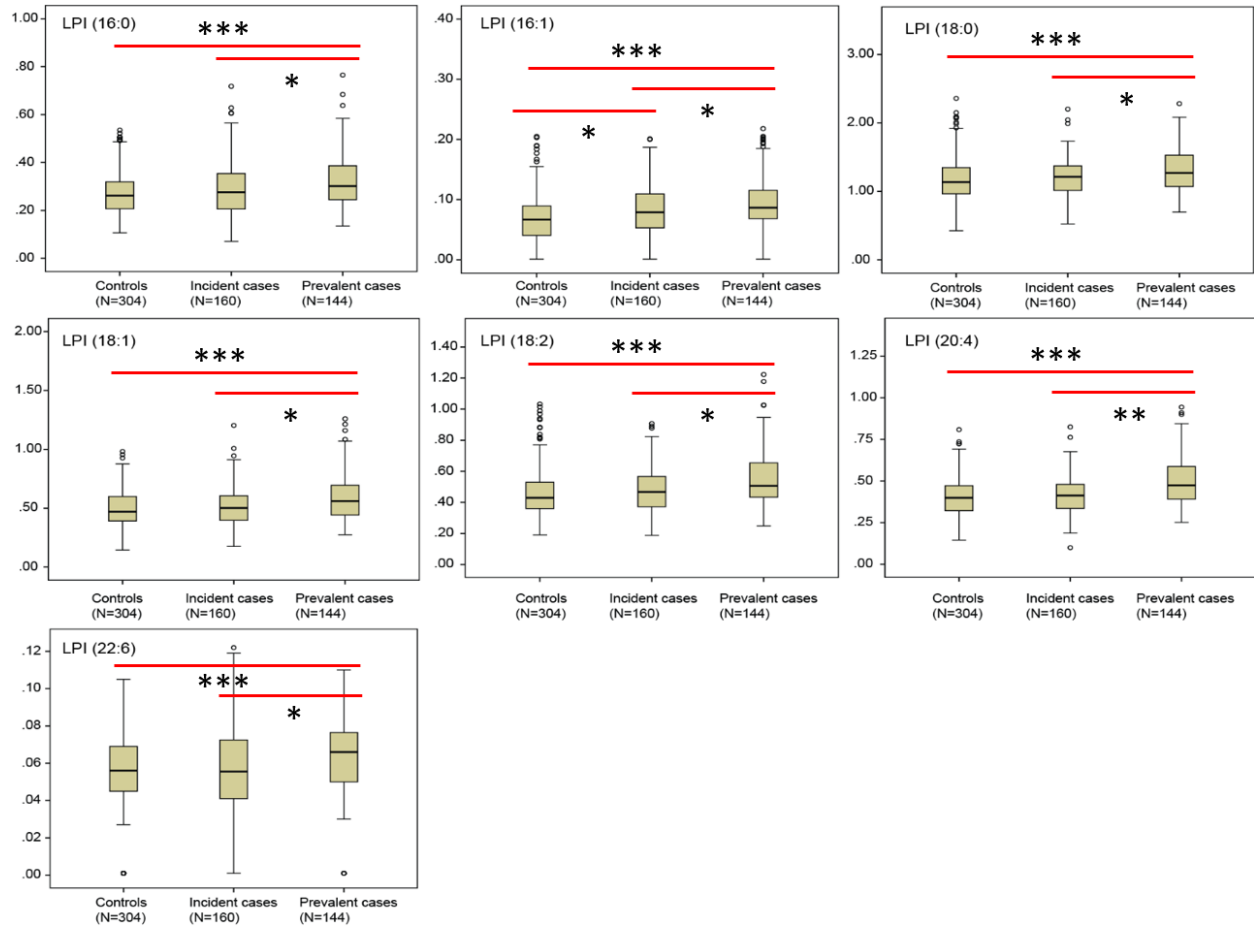

Figure S1. The expression of seven measured Isophosphatidylinositols (LPIs) in controls, incident and prevalent type 2 diabetes. The unit of Y-axis is  $\mu\text{M}$ . \*,  $p < 0.05$ ; \*\*,  $p < 0.01$ ; \*\*\*,  $p < 0.001$  in one-way analysis of covariance (ANCOVA), adjusting for BMI, history of hypertension, smoking, physical activity, fasting status, triglycerides, and HDL-cholesterol.
